# Supplementary material
Source: PubMed Central journal article supplement (PMC5648390)
Supplement: APJCP-18-1855Supp.pdf [file APJCP-18-1855Supp.pdf]

Supplementary Table 1 : NFKB1 –94 ins/del ATTG and NFKB1A -826 C/T polymorphism with clinicopathological variables in HNSCC.

| Variable                     | del/del    | del/ins+ins/ins | OR<br>(95% C.I.) | p<br>value | AOR<br>(95% C.I.) | p<br>value |
|------------------------------|------------|-----------------|------------------|------------|-------------------|------------|
| <b>NFKB1</b>                 |            |                 |                  |            |                   |            |
| <b>Clinical Stage</b>        |            |                 |                  |            |                   |            |
| I+II                         | 3(6.38%)   | 44(93.62%)      | 1 (ref)          |            | 1 (ref)           |            |
| III+IV                       | 15(5.66%)  | 250(94.34%)     | 1.13(0.31-4.08)  | 0.845      | 1.28(0.34-4.75)   | 0.703      |
| <b>Tumor Size</b>            |            |                 |                  |            |                   |            |
| T1+T2                        | 3(4.29%)   | 67(95.71%)      | 1 (ref)          |            | 1 (ref)           |            |
| T3+T4                        | 15(6.20%)  | 227(93.80%)     | 0.67(0.19-2.41)  | 0.548      | 0.78(0.21-2.85)   | 0.712      |
| <b>Lymph Node Metastasis</b> |            |                 |                  |            |                   |            |
| No                           | 8(6.30%)   | 119(93.70%)     | 1 (ref)          |            | 1 (ref)           |            |
| Yes                          | 10(5.41%)  | 175(94.59%)     | 1.17(0.45-3.06)  | 0.740      | 1.22(0.46-3.24)   | 0.687      |
| <b>NFKB1A</b>                |            |                 |                  |            |                   |            |
| Variable                     | CC         | CT+TT           | OR<br>(95% C.I.) | p<br>value | AOR<br>(95% C.I.) | p<br>value |
| <b>Clinical Stage</b>        |            |                 |                  |            |                   |            |
| I+II                         | 4(8.51%)   | 43(91.49%)      | 1 (ref)          |            | 1 (ref)           |            |
| III+IV                       | 28(10.57%) | 237(89.43%)     | 0.78(0.26-2.35)  | 0.669      | 0.83(0.27-2.55)   | 0.755      |
| <b>Tumor Size</b>            |            |                 |                  |            |                   |            |
| T1+T2                        | 6(8.57%)   | 64(91.43%)      | 1 (ref)          |            | 1 (ref)           |            |
| T3+T4                        | 26(10.74%) | 216(89.26%)     | 0.77(0.30-1.97)  | 0.599      | 0.75(0.29-1.94)   | 0.555      |
| <b>Lymph Node Metastasis</b> |            |                 |                  |            |                   |            |
| No                           | 10(7.87%)  | 117(92.13%)     | 1 (ref)          |            | 1 (ref)           |            |
| Yes                          | 22(11.89%) | 163(88.11%)     | 0.63(0.28-1.38)  | 0.254      | 0.66(0.29-0.47)   | 0.316      |

- Abbreviations: OR: Odd Ratios, AOR; Adjusted Odd Ratios
- ORs with 95% CIs were estimated by logistic regression models.
- AORs with 95% CIs were estimated by multiple logistic regression models after controlling for sex, age, tobacco chewing, alcohol consumption, and smoking status.
